# Supplementary material
Source: PubMed Central journal article supplement (PMC5698071)
Supplement: ASN.2017010098SupplementaryData.pdf [file ASN.2017010098SupplementaryData.pdf]

**Supplemental Table 1. The comparison between included and excluded 2010 dialysis prevalent patients**

| Characteristics                            | All<br>(n = 513,647) | Inclusion*<br>(n = 153,758) | Exclusion<br>(n = 359,889) | P-value |
|--------------------------------------------|----------------------|-----------------------------|----------------------------|---------|
| Male sex                                   | 55.7                 | 52.2                        | 57.3                       | <0.001  |
| Race                                       |                      |                             |                            | <0.001  |
| White                                      | 58.9                 | 52.2                        | 61.7                       |         |
| Black                                      | 34.6                 | 42.0                        | 31.5                       |         |
| Other                                      | 6.5                  | 5.8                         | 6.8                        |         |
| Age group                                  |                      |                             |                            | <0.001  |
| 20-44                                      | 13.9                 | 16.4                        | 11.8                       |         |
| 45-64                                      | 40.9                 | 43.5                        | 39.8                       |         |
| 65+                                        | 45.2                 | 40.2                        | 47.4                       |         |
| ESRD vintage                               |                      |                             |                            | <0.001  |
| 1-2 years                                  | 37.7                 | 16.6                        | 46.7                       |         |
| 3-4 years                                  | 24.0                 | 29.6                        | 21.6                       |         |
| 5+ years                                   | 38.3                 | 53.8                        | 31.7                       |         |
| Insurance type                             |                      |                             |                            | <0.001  |
| Part AB and D                              | 31.8                 | 100.0                       | 2.62                       |         |
| Part AB only                               | 12.6                 | 0.0                         | 18.0                       |         |
| Part D only                                | 15.9                 | 0.0                         | 22.6                       |         |
| Other                                      | 39.8                 | 0.0                         | 56.8                       |         |
| Residential area                           |                      |                             |                            | <0.001  |
| Large metropolitan                         | 55.3                 | 51.3                        | 57.0                       |         |
| Medium/small metropolitan                  | 28.4                 | 29.7                        | 27.9                       |         |
| Non-metropolitan                           | 16.3                 | 19.0                        | 15.1                       |         |
| Nursing home residence†                    | 8.4                  | 11.5                        | 7.1                        | <0.001  |
| Cancer‡                                    | 7.4                  | 5.4                         | 8.2                        | <0.001  |
| Prior pain-related hospitalization in 2010 | 4.5                  | 6.7                         | 3.6                        | <0.001  |
| Number of prior hospitalizations in 2010   |                      |                             |                            | <0.001  |
| 0                                          | 49.5                 | 41.9                        | 52.8                       |         |
| 1-2                                        | 31.4                 | 34.5                        | 30.1                       |         |
| 3-4                                        | 11.5                 | 13.4                        | 10.7                       |         |
| 5 or more                                  | 7.5                  | 10.2                        | 6.4                        |         |
| Smoker                                     | 6.1                  | 6.8                         | 5.8                        | <0.001  |
| Congestive heart failure                   | 26.7                 | 25.2                        | 27.4                       | <0.001  |
| Peripheral vascular disease                | 11.1                 | 9.8                         | 11.6                       | <0.001  |
| Cerebrovascular disease                    | 7.7                  | 7.4                         | 7.9                        | <0.001  |
| Chronic obstructive pulmonary disease      | 6.4                  | 5.2                         | 7.0                        | <0.001  |
| Atherosclerotic heart disease              | 17.7                 | 15.5                        | 18.7                       | <0.001  |
| Diabetes                                   | 55.4                 | 54.4                        | 55.8                       | <0.001  |
| AIDS                                       | 0.7                  | 1.0                         | 0.6                        | <0.001  |

Note: Values expressed as percent.

Chi square test for comparison

\* Please refer to Figure 1 for inclusion criteria

† Based on one or more claims in physician/carrier files

‡ Based on one or more inpatient stays with a cancer diagnosis and Form 2728

**Supplemental Table 2. Dialysis patient characteristics by status of opioid prescription\* in 2010 patients without any opioid filled from July 1, 2009 to December 31, 2009**

| Characteristics                       | All<br>(n = 62,228) | Non-user<br>(n = 36,026) | Short-term<br>prescription<br>(n = 24,346) | Chronic<br>prescription<br>(n=1,856) | P-value for<br>overall<br>comparison |
|---------------------------------------|---------------------|--------------------------|--------------------------------------------|--------------------------------------|--------------------------------------|
| Opioid prescription                   |                     |                          |                                            |                                      | <0.001                               |
| <20 MME/day                           |                     | -                        | 18.5                                       | 34.2                                 |                                      |
| 20-50 MME/day                         |                     | -                        | 56.1                                       | 45.2                                 |                                      |
| 50+ MME/day                           |                     | -                        | 25.4                                       | 20.7                                 |                                      |
| Male sex                              | 56.3                | 59.0                     | 52.8                                       | 50.3                                 | <0.001¶                              |
| Race                                  |                     |                          |                                            |                                      | <0.001                               |
| White                                 | 51.8                | 52.4                     | 50.9                                       | 52.4                                 |                                      |
| Black                                 | 40.8                | 39.0                     | 43.1                                       | 43.5                                 |                                      |
| Other                                 | 7.4                 | 8.6                      | 6.0                                        | 4.1                                  |                                      |
| Age group                             |                     |                          |                                            |                                      | <0.001                               |
| 20-44                                 | 15.0                | 13.9                     | 16.7                                       | 15.2                                 |                                      |
| 45-64                                 | 40.5                | 39.2                     | 41.9                                       | 45.6                                 |                                      |
| 65+                                   | 44.5                | 46.9                     | 41.4                                       | 39.2                                 |                                      |
| ESRD year                             |                     |                          |                                            |                                      | 0.002††                              |
| 1-2 years                             | 6.3                 | 6.2                      | 6.5                                        | 5.8                                  |                                      |
| 3-4 years                             | 32.7                | 33.3                     | 31.8                                       | 34.2                                 |                                      |
| 5+ years                              | 61.0                | 60.5                     | 61.7                                       | 60.0                                 |                                      |
| Dialysis modality                     |                     |                          |                                            |                                      | 0.002**                              |
| Hemodialysis                          | 94.1                | 94.1                     | 94.0                                       | 96.0                                 |                                      |
| Peritoneal dialysis                   | 5.9                 | 5.9                      | 6.0                                        | 4.0                                  |                                      |
| History of kidney transplantation     | 7.7                 | 7.1                      | 8.5                                        | 7.5                                  | <0.001††                             |
| Analgesic prescription                | 11.3                | 8.4                      | 14.9                                       | 22.3                                 | <0.001                               |
| Dual status†                          | 66.4                | 63.7                     | 69.7                                       | 75.7                                 | <0.001                               |
| Residential area                      |                     |                          |                                            |                                      | <0.001¶                              |
| Large metropolitan                    | 55.1                | 57.4                     | 52.1                                       | 50.0                                 |                                      |
| Medium/small metropolitan             | 27.9                | 26.8                     | 29.2                                       | 30.1                                 |                                      |
| Non-metropolitan                      | 17.1                | 15.8                     | 18.7                                       | 19.9                                 |                                      |
| Nursing home residence‡               | 9.4                 | 8.4                      | 10.4                                       | 17.1                                 | <0.001                               |
| Cancer§                               | 5.2                 | 4.8                      | 5.6                                        | 6.4                                  | <0.001¶                              |
| Prior pain-related hospitalization    | 3.4                 | 1.9                      | 5.1                                        | 11.3                                 | <0.001                               |
| Number of prior hospitalizations      |                     |                          |                                            |                                      | <0.001                               |
| 0                                     | 49.6                | 59.4                     | 36.8                                       | 27.6                                 |                                      |
| 1-2                                   | 33.4                | 29.6                     | 39.0                                       | 35.3                                 |                                      |
| 3-4                                   | 10.7                | 7.4                      | 14.9                                       | 19.5                                 |                                      |
| 5 or more                             | 6.3                 | 3.6                      | 9.3                                        | 17.6                                 |                                      |
| Smoker                                | 5.2                 | 4.8                      | 5.5                                        | 8.6                                  | <0.001                               |
| Congestive heart failure              | 24.0                | 23.8                     | 24.0                                       | 27.2                                 | 0.004**                              |
| Peripheral vascular disease           | 8.9                 | 8.8                      | 8.9                                        | 10.0                                 | 0.20                                 |
| Cerebrovascular disease               | 7.2                 | 7.2                      | 7.1                                        | 7.1                                  | 0.90                                 |
| Chronic obstructive pulmonary disease | 4.0                 | 3.9                      | 4.1                                        | 5.7                                  | <0.001**                             |
| Atherosclerotic heart disease         | 15.0                | 15.3                     | 14.3                                       | 17.7                                 | <0.001                               |
| Diabetes                              | 52.2                | 51.4                     | 53.0                                       | 58.0                                 | <0.001                               |
| AIDS                                  | 0.9                 | 0.8                      | 0.9                                        | 1.0                                  | 0.42                                 |

Abbreviations: MME, morphine milligram equivalent.

Note: Values expressed as percent.

Chi square test for overall (3-group) and 3-pair (non-user vs. short-term prescription; non-user vs. chronic prescription; short-term prescription vs. chronic prescription) comparisons.

Statistical significance was defined as  $p < 0.017$  using two-tailed tests, based on Bonferroni method for paired, multiple comparison.

\* Short-term: 1- to 89-day supply within study year; chronic: 90-day or more supply within study year

† Dual status in Medicare and Medicaid

‡ Based on one or more claims in physician/carrier files

§ Based on one or more inpatient stays with a cancer diagnosis and Form 2728

¶ The difference between short-term prescription and chronic prescription was not significant; other comparisons were significant

\*\* The difference between non-users and short-term prescription was not significant; other comparisons were significant

†† The differences between non-users and chronic prescription and between short-term prescription and chronic prescription were not significant; the difference between non-users and short-term prescription was significant

**Supplemental Table 3. Adjusted hazard ratios of death, discontinued dialysis, and hospitalization in 2011-2012, associated with 2010 prescription for  $\geq 90$  days of an opioid in 2010 patients without any opioid filled from July 1, 2009 to December 31, 2009 (n = 60,579)**

| Characteristics                   | Outcome = death |              |         | Outcome = discontinued dialysis |              |         | Outcome = hospitalization |              |         |
|-----------------------------------|-----------------|--------------|---------|---------------------------------|--------------|---------|---------------------------|--------------|---------|
|                                   | HR              | (95% CI)     | P value | HR                              | (95% CI)     | P value | HR                        | (95% CI)     | P value |
| Opioid prescription*              |                 |              |         |                                 |              |         |                           |              |         |
| None                              | 1.00            |              |         | 1.00                            |              |         | 1.00                      |              |         |
| Short term                        | 1.01            | (0.97, 1.04) | 0.67    | 1.04                            | (0.93, 1.16) | 0.48    | 1.07                      | (1.05, 1.10) | <0.001  |
| Chronic,<br><20 MME/day           | 1.12            | (0.97, 1.29) | 0.13    | 1.27                            | (0.82, 1.97) | 0.28    | 1.26                      | (1.16, 1.38) | <0.001  |
| Chronic,<br>20-50 MME/day         | 1.32            | (1.17, 1.48) | <0.001  | 1.53                            | (1.06, 2.21) | 0.02    | 1.28                      | (1.19, 1.38) | <0.001  |
| Chronic,<br>50+ MME/day           | 1.46            | (1.24, 1.71) | <0.001  | 0.92                            | (0.49, 1.72) | 0.79    | 1.25                      | (1.12, 1.40) | <0.001  |
| Analgesic prescription            |                 |              |         |                                 |              |         |                           |              |         |
| No                                | 1.00            |              |         | 1.00                            |              |         | 1.00                      |              |         |
| Yes                               | 0.98            | (0.94, 1.03) | 0.49    | 1.03                            | (0.87, 1.21) | 0.76    | 1.04                      | (1.01, 1.07) | 0.007   |
| Gender                            |                 |              |         |                                 |              |         |                           |              |         |
| Female                            | 1.00            |              |         | 1.00                            |              |         | 1.00                      |              |         |
| Male                              | 1.11            | (1.08, 1.15) | <0.001  | 0.90                            | (0.81, 1.00) | 0.06    | 0.94                      | (0.93, 0.96) | <0.001  |
| Race                              |                 |              |         |                                 |              |         |                           |              |         |
| White                             | 1.00            |              |         | 1.00                            |              |         | 1.00                      |              |         |
| Black                             | 0.84            | (0.81, 0.87) | <0.001  | 0.65                            | (0.58, 0.74) | <0.001  | 0.96                      | (0.94, 0.98) | <0.001  |
| Other                             | 0.93            | (0.88, 0.99) | 0.03    | 0.66                            | (0.52, 0.84) | <0.001  | 0.92                      | (0.89, 0.96) | <0.001  |
| Age group                         |                 |              |         |                                 |              |         |                           |              |         |
| 20-44                             | 1.00            |              |         | 1.00                            |              |         | 1.00                      |              |         |
| 45-64                             | 2.10            | (1.94, 2.28) | <0.001  | 2.40                            | (1.66, 3.46) | <0.001  | 1.08                      | (1.04, 1.11) | <0.001  |
| 65+                               | 3.90            | (3.59, 4.22) | <0.001  | 8.38                            | (5.86, 12.0) | <0.001  | 1.28                      | (1.24, 1.32) | <0.001  |
| ESRD vintage                      |                 |              |         |                                 |              |         |                           |              |         |
| 1-2 years                         | 1.00            |              |         | 1.00                            |              |         | 1.00                      |              |         |
| 3-4 years                         | 1.09            | (1.02, 1.16) | 0.01    | 1.01                            | (0.83, 1.22) | 0.96    | 1.04                      | (1.00, 1.08) | 0.04    |
| 5+ years                          | 1.25            | (1.17, 1.33) | <0.001  | 1.04                            | (0.86, 1.25) | 0.70    | 1.07                      | (1.03, 1.11) | 0.001   |
| Dialysis modality                 |                 |              |         |                                 |              |         |                           |              |         |
| Hemodialysis                      | 1.00            |              |         | 1.00                            |              |         | 1.00                      |              |         |
| Peritoneal dialysis               | 1.36            | (1.27, 1.46) | <0.001  | 1.20                            | (0.95, 1.50) | 0.12    | 1.20                      | (1.16, 1.25) | <0.001  |
| History of kidney transplantation |                 |              |         |                                 |              |         |                           |              |         |
| No                                | 1.00            |              |         | 1.00                            |              |         | 1.00                      |              |         |
| Yes                               | 0.85            | (0.78, 0.93) | <0.001  | 0.50                            | (0.34, 0.74) | <0.001  | 0.98                      | (0.94, 1.01) | 0.21    |
| Dual status†                      |                 |              |         |                                 |              |         |                           |              |         |
| No                                | 1.00            |              |         | 1.00                            |              |         | 1.00                      |              |         |
| Yes                               | 0.90            | (0.87, 0.94) | <0.001  | 0.73                            | (0.65, 0.81) | <0.001  | 1.01                      | (0.99, 1.03) | 0.56    |
| Residential area                  |                 |              |         |                                 |              |         |                           |              |         |
| Large                             | 1.00            |              |         | 1.00                            |              |         | 1.00                      |              |         |
| Medium/small                      | 1.01            | (0.97, 1.05) | 0.62    | 1.69                            | (1.50, 1.90) | <0.001  | 0.97                      | (0.95, 0.99) | 0.004   |
| Non-metro                         | 1.08            | (1.03, 1.12) | 0.001   | 1.79                            | (1.57, 2.05) | <0.001  | 0.90                      | (0.88, 0.93) | <0.001  |
| Nursing home residence‡           |                 |              |         |                                 |              |         |                           |              |         |
| No                                | 1.00            |              |         | 1.00                            |              |         | 1.00                      |              |         |
| Yes                               | 1.60            | (1.53, 1.67) | <0.001  | 2.47                            | (2.16, 2.81) | <0.001  | 1.15                      | (1.11, 1.18) | <0.001  |

|                                            |      |              |        |      |              |        |      |              |        |
|--------------------------------------------|------|--------------|--------|------|--------------|--------|------|--------------|--------|
| Cancer§                                    |      |              |        |      |              |        |      |              |        |
| No                                         | 1.00 |              |        | 1.00 |              |        | 1.00 |              |        |
| Yes                                        | 1.24 | (1.17, 1.31) | <0.001 | 1.47 | (1.24, 1.73) | <0.001 | 1.02 | (0.98, 1.06) | 0.31   |
| Prior pain-related hospitalization in 2010 |      |              |        |      |              |        |      |              |        |
| No                                         | 1.00 |              |        | 1.00 |              |        | 1.00 |              |        |
| Yes                                        | 0.93 | (0.86, 1.00) | 0.06   | 0.84 | (0.64, 1.11) | 0.22   | 1.13 | (1.07, 1.18) | <0.001 |
| Number of prior hospitalizations in 2010   |      |              |        |      |              |        |      |              |        |
| 0                                          | 1.00 |              |        | 1.00 |              |        | 1.00 |              |        |
| 1-2                                        | 1.59 | (1.53, 1.65) | <0.001 | 1.38 | (1.22, 1.56) | <0.001 | 1.59 | (1.56, 1.62) | <0.001 |
| 3-4                                        | 2.25 | (2.14, 2.36) | <0.001 | 1.78 | (1.51, 2.10) | <0.001 | 2.39 | (2.31, 2.46) | <0.001 |
| 5 or more                                  | 3.14 | (2.96, 3.32) | <0.001 | 2.86 | (2.37, 3.45) | <0.001 | 3.64 | (3.50, 3.78) | <0.001 |
| Smoker                                     |      |              |        |      |              |        |      |              |        |
| No                                         | 1.00 |              |        | 1.00 |              |        | 1.00 |              |        |
| Yes                                        | 1.12 | (1.04, 1.21) | 0.002  | 1.33 | (1.06, 1.67) | 0.01   | 1.08 | (1.03, 1.13) | <0.001 |
| Congestive heart failure                   |      |              |        |      |              |        |      |              |        |
| No                                         | 1.00 |              |        | 1.00 |              |        | 1.00 |              |        |
| Yes                                        | 1.24 | (1.19, 1.28) | <0.001 | 0.99 | (0.88, 1.12) | 0.88   | 1.08 | (1.05, 1.10) | <0.001 |
| Peripheral vascular disease                |      |              |        |      |              |        |      |              |        |
| No                                         | 1.00 |              |        | 1.00 |              |        | 1.00 |              |        |
| Yes                                        | 1.09 | (1.03, 1.14) | 0.001  | 1.12 | (0.96, 1.31) | 0.15   | 1.00 | (0.97, 1.03) | 0.96   |
| Cerebrovascular disease                    |      |              |        |      |              |        |      |              |        |
| No                                         | 1.00 |              |        | 1.00 |              |        | 1.00 |              |        |
| Yes                                        | 1.04 | (0.98, 1.10) | 0.16   | 1.32 | (1.12, 1.55) | <0.001 | 1.06 | (1.03, 1.10) | <0.001 |
| Chronic obstructive pulmonary disease      |      |              |        |      |              |        |      |              |        |
| No                                         | 1.00 |              |        | 1.00 |              |        | 1.00 |              |        |
| Yes                                        | 1.12 | (1.05, 1.20) | <0.001 | 1.01 | (0.81, 1.25) | 0.96   | 1.11 | (1.06, 1.17) | <0.001 |
| Atherosclerotic heart disease              |      |              |        |      |              |        |      |              |        |
| No                                         | 1.00 |              |        | 1.00 |              |        | 1.00 |              |        |
| Yes                                        | 1.18 | (1.13, 1.23) | <0.001 | 1.02 | (0.89, 1.17) | 0.76   | 1.11 | (1.08, 1.14) | <0.001 |
| Diabetes                                   |      |              |        |      |              |        |      |              |        |
| No                                         | 1.00 |              |        | 1.00 |              |        | 1.00 |              |        |
| Yes                                        | 1.18 | (1.14, 1.23) | <0.001 | 0.87 | (0.78, 0.97) | 0.01   | 1.13 | (1.11, 1.16) | <0.001 |
| AIDS                                       |      |              |        |      |              |        |      |              |        |
| No                                         | 1.00 |              |        | 1.00 |              |        | 1.00 |              |        |
| Yes                                        | 1.06 | (0.85, 1.32) | 0.61   | 1.45 | (0.65, 3.26) | 0.37   | 1.16 | (1.05, 1.29) | 0.003  |

Abbreviations: HR, hazard ratio; CI, confidence interval; MME, morphine milligram equivalent.

\* Short term: 1- to 89-day filled prescription supply within study year; chronic: 90-day or more filled prescription supply within study year

† Dual status in Medicare and Medicaid

‡ Based on one or more claims in physician/carrier files

§ Based on one or more inpatient stay with a cancer diagnosis and Form 2728

**Supplemental Table 4. Dialysis patient characteristics by drug group\* in 2010 patients without any opioid or analgesic filled from July 1, 2009 to December 31, 2009**

| Characteristics                       | All<br>(n = 26,411) | New opioid user<br>(n = 23,311) | New analgesic user<br>(n = 3,100) | P-value |
|---------------------------------------|---------------------|---------------------------------|-----------------------------------|---------|
| Male sex                              | 53.0                | 53.1                            | 51.8                              | 0.16    |
| Race                                  |                     |                                 |                                   | <0.001  |
| White                                 | 51.2                | 51.1                            | 52.7                              |         |
| Black                                 | 42.7                | 43.4                            | 37.0                              |         |
| Other                                 | 6.1                 | 5.5                             | 10.3                              |         |
| Age group                             |                     |                                 |                                   | <0.001  |
| 20-44                                 | 16.4                | 17.2                            | 10.0                              |         |
| 45-64                                 | 41.9                | 42.2                            | 39.8                              |         |
| 65+                                   | 41.7                | 40.6                            | 50.2                              |         |
| ESRD year                             |                     |                                 |                                   | 0.01    |
| 1-2 years                             | 6.7                 | 6.5                             | 7.9                               |         |
| 3-4 years                             | 32.0                | 32.0                            | 32.1                              |         |
| 5+ years                              | 61.3                | 61.5                            | 60.0                              |         |
| Dialysis modality                     |                     |                                 |                                   | 0.01    |
| Hemodialysis                          | 94.1                | 94.0                            | 95.1                              |         |
| Peritoneal dialysis                   | 5.9                 | 6.0                             | 4.9                               |         |
| History of kidney transplantation     | 8.2                 | 8.6                             | 5.5                               | <0.001  |
| Dual status†                          | 69.6                | 69.1                            | 73.0                              | <0.001  |
| Residential area                      |                     |                                 |                                   | <0.001  |
| Large metropolitan                    | 52.3                | 51.3                            | 59.9                              |         |
| Medium/small metropolitan             | 29.2                | 29.7                            | 25.2                              |         |
| Non-metropolitan                      | 18.5                | 19.0                            | 14.9                              |         |
| Nursing home residence‡               | 10.8                | 10.8                            | 10.2                              | 0.32    |
| Cancer§                               | 5.6                 | 5.7                             | 5.1                               | 0.15    |
| Prior pain-related hospitalization    | 5.2                 | 5.4                             | 3.6                               | <0.001  |
| Number of prior hospitalizations      |                     |                                 |                                   | <0.001  |
| 0                                     | 37.8                | 36.2                            | 49.9                              |         |
| 1-2                                   | 38.2                | 38.7                            | 34.4                              |         |
| 3-4                                   | 14.7                | 15.4                            | 10.0                              |         |
| 5 or more                             | 9.3                 | 9.7                             | 5.7                               |         |
| Smoker                                | 5.6                 | 5.8                             | 4.2                               | <0.001  |
| Congestive heart failure              | 24.2                | 24.3                            | 23.7                              | 0.48    |
| Peripheral vascular disease           | 9.0                 | 8.9                             | 9.5                               | 0.34    |
| Cerebrovascular disease               | 7.1                 | 7.2                             | 6.8                               | 0.39    |
| Chronic obstructive pulmonary disease | 4.2                 | 4.3                             | 3.8                               | 0.20    |
| Atherosclerotic heart disease         | 14.5                | 14.4                            | 15.6                              | 0.08    |
| Diabetes                              | 53.6                | 52.7                            | 60.3                              | <0.001  |
| AIDS                                  | 0.9                 | 0.9                             | 0.9                               | 0.71    |

Note: Values expressed as percent.

\* New opioid users or new analgesic users

† Dual status in Medicare and Medicaid

‡ Based on one or more claims in physician/carrier files

§ Based on one or more inpatient stays with a cancer diagnosis and Form 2728

**Supplemental Table 5. Adjusted hazard ratios of death, discontinued dialysis, and hospitalization in 2011-2012, associated with 2010 new drug prescription\* in 2010 patients without any opioid or analgesic filled from July 1, 2009 to December 31, 2009 (n = 25,686)**

| Characteristics                            | Outcome = death |              |         | Outcome = discontinued dialysis |              |         | Outcome = hospitalization |              |         |
|--------------------------------------------|-----------------|--------------|---------|---------------------------------|--------------|---------|---------------------------|--------------|---------|
|                                            | HR              | (95% CI)     | P value | HR                              | (95% CI)     | P value | HR                        | (95% CI)     | P value |
| New prescription                           |                 |              |         |                                 |              |         |                           |              |         |
| Analgesic                                  | 1.00            |              |         | 1.00                            |              |         | 1.00                      |              |         |
| Opioid                                     | 1.06            | (0.99, 1.14) | 0.12    | 0.90                            | (0.71, 1.13) | 0.36    | 1.01                      | (0.96, 1.05) | 0.83    |
| Gender                                     |                 |              |         |                                 |              |         |                           |              |         |
| Female                                     | 1.00            |              |         | 1.00                            |              |         | 1.00                      |              |         |
| Male                                       | 1.08            | (1.03, 1.14) | <0.001  | 0.89                            | (0.76, 1.04) | 0.14    | 0.97                      | (0.95, 1.00) | 0.05    |
| Race                                       |                 |              |         |                                 |              |         |                           |              |         |
| White                                      | 1.00            |              |         | 1.00                            |              |         | 1.00                      |              |         |
| Black                                      | 0.81            | (0.77, 0.86) | <0.001  | 0.60                            | (0.50, 0.72) | <0.001  | 0.98                      | (0.95, 1.01) | 0.21    |
| Other                                      | 0.90            | (0.82, 0.99) | 0.04    | 0.65                            | (0.45, 0.95) | 0.03    | 0.94                      | (0.89, 1.00) | 0.06    |
| Age group                                  |                 |              |         |                                 |              |         |                           |              |         |
| 20-44                                      | 1.00            |              |         | 1.00                            |              |         | 1.00                      |              |         |
| 45-64                                      | 2.00            | (1.80, 2.22) | <0.001  | 2.46                            | (1.51, 4.00) | <0.001  | 1.09                      | (1.04, 1.13) | <0.001  |
| 65+                                        | 3.64            | (3.27, 4.05) | <0.001  | 7.96                            | (4.94, 12.8) | <0.001  | 1.27                      | (1.22, 1.34) | <0.001  |
| ESRD vintage                               |                 |              |         |                                 |              |         |                           |              |         |
| 1-2 years                                  | 1.00            |              |         | 1.00                            |              |         | 1.00                      |              |         |
| 3-4 years                                  | 1.07            | (0.98, 1.18) | 0.13    | 0.97                            | (0.73, 1.27) | 0.80    | 1.08                      | (1.02, 1.15) | 0.01    |
| 5+ years                                   | 1.24            | (1.14, 1.36) | <0.001  | 1.10                            | (0.84, 1.44) | 0.49    | 1.10                      | (1.04, 1.16) | 0.002   |
| Dialysis modality                          |                 |              |         |                                 |              |         |                           |              |         |
| Hemodialysis                               | 1.00            |              |         | 1.00                            |              |         | 1.00                      |              |         |
| Peritoneal dialysis                        | 1.36            | (1.24, 1.50) | <0.001  | 1.37                            | (1.00, 1.88) | 0.05    | 1.24                      | (1.17, 1.31) | <0.001  |
| History of kidney transplantation          |                 |              |         |                                 |              |         |                           |              |         |
| No                                         | 1.00            |              |         | 1.00                            |              |         | 1.00                      |              |         |
| Yes                                        | 0.78            | (0.69, 0.88) | <0.001  | 0.48                            | (0.28, 0.83) | 0.01    | 0.95                      | (0.90, 1.00) | 0.07    |
| Dual status†                               |                 |              |         |                                 |              |         |                           |              |         |
| No                                         | 1.00            |              |         | 1.00                            |              |         | 1.00                      |              |         |
| Yes                                        | 0.89            | (0.85, 0.94) | <0.001  | 0.69                            | (0.59, 0.82) | <0.001  | 1.00                      | (0.97, 1.03) | 0.93    |
| Residential area                           |                 |              |         |                                 |              |         |                           |              |         |
| Large                                      | 1.00            |              |         | 1.00                            |              |         | 1.00                      |              |         |
| Medium/small                               | 1.07            | (1.01, 1.13) | 0.02    | 1.74                            | (1.46, 2.08) | <0.001  | 0.98                      | (0.95, 1.01) | 0.14    |
| Non-metro                                  | 1.13            | (1.07, 1.20) | <0.001  | 1.96                            | (1.61, 2.38) | <0.001  | 0.90                      | (0.86, 0.93) | <0.001  |
| Nursing home residence‡                    |                 |              |         |                                 |              |         |                           |              |         |
| No                                         | 1.00            |              |         | 1.00                            |              |         | 1.00                      |              |         |
| Yes                                        | 1.57            | (1.48, 1.67) | <0.001  | 2.34                            | (1.94, 2.83) | <0.001  | 1.13                      | (1.08, 1.18) | <0.001  |
| Cancer§                                    |                 |              |         |                                 |              |         |                           |              |         |
| No                                         | 1.00            |              |         | 1.00                            |              |         | 1.00                      |              |         |
| Yes                                        | 1.28            | (1.18, 1.39) | <0.001  | 1.25                            | (0.97, 1.61) | 0.09    | 1.02                      | (0.97, 1.09) | 0.44    |
| Prior pain-related hospitalization in 2010 |                 |              |         |                                 |              |         |                           |              |         |
| No                                         | 1.00            |              |         | 1.00                            |              |         | 1.00                      |              |         |
| Yes                                        | 0.92            | (0.83, 1.01) | 0.08    | 0.91                            | (0.66, 1.25) | 0.56    | 1.07                      | (1.01, 1.14) | 0.02    |

|                                          |      |              |        |      |              |        |      |              |        |
|------------------------------------------|------|--------------|--------|------|--------------|--------|------|--------------|--------|
| Number of prior hospitalizations in 2010 |      |              |        |      |              |        |      |              |        |
| 0                                        | 1.00 |              |        | 1.00 |              |        | 1.00 |              |        |
| 1-2                                      | 1.47 | (1.39, 1.56) | <0.001 | 1.26 | (1.03, 1.53) | 0.02   | 1.44 | (1.40, 1.49) | <0.001 |
| 3-4                                      | 2.02 | (1.89, 2.17) | <0.001 | 1.75 | (1.39, 2.21) | <0.001 | 2.04 | (1.96, 2.13) | <0.001 |
| 5 or more                                | 2.92 | (2.71, 3.16) | <0.001 | 2.88 | (2.23, 3.72) | <0.001 | 2.81 | (2.66, 2.96) | <0.001 |
| Smoker                                   |      |              |        |      |              |        |      |              |        |
| No                                       | 1.00 |              |        | 1.00 |              |        | 1.00 |              |        |
| Yes                                      | 1.17 | (1.06, 1.29) | 0.002  | 1.43 | (1.04, 1.96) | 0.03   | 1.07 | (1.00, 1.13) | 0.04   |
| Congestive heart failure                 |      |              |        |      |              |        |      |              |        |
| No                                       | 1.00 |              |        | 1.00 |              |        | 1.00 |              |        |
| Yes                                      | 1.24 | (1.18, 1.31) | <0.001 | 0.98 | (0.82, 1.18) | 0.85   | 1.08 | (1.04, 1.11) | <0.001 |
| Peripheral vascular disease              |      |              |        |      |              |        |      |              |        |
| No                                       | 1.00 |              |        | 1.00 |              |        | 1.00 |              |        |
| Yes                                      | 1.12 | (1.04, 1.20) | 0.003  | 1.20 | (0.95, 1.51) | 0.12   | 0.96 | (0.91, 1.01) | 0.09   |
| Cerebrovascular disease                  |      |              |        |      |              |        |      |              |        |
| No                                       | 1.00 |              |        | 1.00 |              |        | 1.00 |              |        |
| Yes                                      | 1.02 | (0.95, 1.11) | 0.56   | 1.21 | (0.95, 1.55) | 0.13   | 1.05 | (1.00, 1.11) | 0.08   |
| Chronic obstructive pulmonary disease    |      |              |        |      |              |        |      |              |        |
| No                                       | 1.00 |              |        | 1.00 |              |        | 1.00 |              |        |
| Yes                                      | 1.06 | (0.96, 1.16) | 0.27   | 1.05 | (0.77, 1.43) | 0.75   | 1.10 | (1.02, 1.17) | 0.01   |
| Atherosclerotic heart disease            |      |              |        |      |              |        |      |              |        |
| No                                       | 1.00 |              |        | 1.00 |              |        | 1.00 |              |        |
| Yes                                      | 1.17 | (1.11, 1.25) | <0.001 | 1.06 | (0.87, 1.29) | 0.58   | 1.10 | (1.05, 1.14) | <0.001 |
| Diabetes                                 |      |              |        |      |              |        |      |              |        |
| No                                       | 1.00 |              |        | 1.00 |              |        | 1.00 |              |        |
| Yes                                      | 1.15 | (1.10, 1.21) | <0.001 | 0.79 | (0.67, 0.93) | 0.004  | 1.10 | (1.07, 1.13) | <0.001 |
| AIDS                                     |      |              |        |      |              |        |      |              |        |
| No                                       | 1.00 |              |        | 1.00 |              |        | 1.00 |              |        |
| Yes                                      | 1.01 | (0.74, 1.38) | 0.95   | 2.95 | (1.30, 6.71) | 0.01   | 1.11 | (0.96, 1.28) | 0.17   |

Abbreviations: HR, hazard ratio; CI, confidence interval.

\* New opioid or new analgesic prescriptions

† Dual status in Medicare and Medicaid

‡ Based on one or more claims in physician/carrier files

§ Based on one or more inpatient stay with a cancer diagnosis and Form 2728



**Supplemental Table 6. List of opioid medications**

| Medications                     |
|---------------------------------|
| GUAIFENESIN/HYDROCODONE BIT     |
| HYDROCODONE BIT                 |
| HYDROCODONE BIT/ACETAMINOPHEN   |
| HYDROCODONE BIT/HOMATROPINE     |
| HYDROCODONE TANNATE/CHLOR-TAN   |
| HYDROCODONE/CHLORPHEN POLIS     |
| HYDROCODONE/IBUPROFEN           |
| P-EPD TAN/HYDROCODONE TANNATE   |
| P-EPHED HCL/HYDROCODONE BIT     |
| P-EPHED HCL/HYDROCODONE/BPM     |
| P-EPHED HCL/HYDROCODONE/CP      |
| P-EPHED HCL/HYDROCODONE/TRIPRO  |
| PE/HYDROCODONE/DEXBROMPHENIRMIN |
| PHENYLEPHRINE HCL/HYDROCODONE   |
| PHENYLEPHRINE/HYDROCODONE/BPM   |
| PHENYLEPHRINE/HYDROCODONE/CP    |
| PHENYLEPHRINE/HYDROCODONE/D-CP  |
| PHENYLEPHRINE/HYDROCODONE/DPHA  |
| PHENYLEPHRINE/HYDROCODONE/PYR   |
| POT GUAIAICO/HYDROCODONE BIT    |
| PPA HCL/HYDROCODONE BIT         |
| IBUPROFEN/OXYCODONE HCL         |
| OXYCODONE HCL                   |
| OXYCODONE HCL/ACETAMINOPHEN     |
| OXYCODONE HCL/ASPIRIN           |
| OXYCODONE HCL/OXYCODON TER/ASA  |
| PROPOXYPHENE HCL                |
| PROPOXYPHENE HCL/ACETAMINOPHEN  |
| PROPOXYPHENE HCL/ASA/CAFFEINE   |
| PROPOXYPHENE NAPSYL             |
| PROPOXYPHENE/ACETAMINOPHEN      |
| TRAMADOL HCL                    |
| TRAMADOL HCL/ACETAMINOPHEN      |
| ACETAMINOPHEN WITH CODEINE      |
| ASPIRIN/CODEINE PHOSPHATE       |
| BROMPHENIRAMIN/PE/CODEINE PHOS  |
| CHLORPHENIRAMINE/CODEINE PHOS   |
| CODEINE PHOS/CARISOPRODOL/ASA   |
| CODEINE PHOSPHATE               |
| CODEINE SULF                    |
| CODEINE/BUTALBIT/ACETAMIN/CAFF  |
| CODEINE/BUTALBITAL/ASA/CAFFEIN  |

CODEINE/PROMETHAZINE HCL  
DIPHENHYDRAMIN/PE/CODEINE PHOS  
GUAIFENESIN/CODEINE PHOS  
P-EPHED HCL/CODEINE/GUAIFEN  
MORPHINE SULFATE  
MORPHINE SULFATE/NALTREXONE  
HYDROMORPHONE HCL  
METHADONE HCL  
MEPERIDINE HCL  
OXYMORPHONE HCL  
BUPRENORPHINE HCL  
BUPRENORPHINE HCL/NALOXONE HCL  
TAPENTADOL HYDROCHLORIDE  
FENTANYL  
FENTANYL CITRATE

---

**Supplemental Table 7. List of analgesic medications**

| Medications                    |
|--------------------------------|
| ACETAM/PAMABRM/MAG/E/FA/BCOMPC |
| ACETAMIN/CALCIUM CARB/MAG/CAFF |
| ACETAMINOPHEN                  |
| ACETAMINOPHEN/BROMELAINS       |
| ACETAMINOPHEN/BUTALBITAL       |
| ACETAMINOPHEN/CAFFEINE         |
| ACETAMINOPHEN/CAFFEINE/BUTALB  |
| ACETAMINOPHEN/CALCIUM CARB     |
| ACETAMINOPHEN/CHLOR-MAL        |
| ACETAMINOPHEN/CHLORPHENIRAMINE |
| ACETAMINOPHEN/D-BROMPHENIRAMIN |
| ACETAMINOPHEN/DP-HYDRAM HCL    |
| ACETAMINOPHEN/MAG SAL/PAMABROM |
| ACETAMINOPHEN/MELATONIN        |
| ACETAMINOPHEN/PAMABROM         |
| ACETAMINOPHEN/PHENYLTOLOX/CAFF |
| ACETAMINOPHEN/PHENYLTOLX CIT   |
| ACETAMINOPHEN/PYRILAM/PAMABROM |
| ACETAMINOPHEN/PYRILAMINE MAL   |
| ACETAMINOPHN/CAL CB/CAFF/GLYC  |
| ACETAMINOPHN/PYR MA/PAMABROM   |
| ACETAMINOPHN/PYRIL MAL/CAFFEIN |
| ACETAMINOPHN/SOD BICARB/CIT AC |
| ANTIPYRINE                     |
| APAP/CALCIUM CARB/MAGNESIUM    |
| APAP/PYRIL MAL/PAMABROM        |
| ASA/ACETAMINOPHEN/CAFFEINE/CAL |
| ASA/ACETAMINOPHN/CAFFEIN/POT   |
| ASA/ACETAMINOPHN/MAG/ALH/CAFF  |
| ASA/APAP/MAGNESIUM/ALH/CAFFEIN |
| ASA/CALCIUM CARB/MAG/AL HYDROX |
| ASA/CALCIUM CARB/MAGNESIUM/ALH |
| ASA/DP-HYDRAMINE/SOD BICARB/CA |
| ASA/MAG HYDROX/AL HYDROX/CAFF  |
| ASA/PHENACET/CAFFEINE/ALLOBARB |
| ASA/SAL-AMIDE/APAP/AL HYDROX   |
| ASA/SAL-AMIDE/APAP/CAFFEIN     |
| ASA/SALICYLAM/ACETAMINOPH/CAFF |
| ASPIRIN                        |
| ASPIRIN/ACETAMINOPHEN          |
| ASPIRIN/ACETAMINOPHEN/CAFFEINE |
| ASPIRIN/ACETAMINOPHEN/CAL CARB |
| ASPIRIN/ACETAMINOPHEN/PHENACET |
| ASPIRIN/APAP/AL HYDROX/CAFFEIN |

ASPIRIN/BUTALBITAL  
ASPIRIN/CAFFEINE  
ASPIRIN/CAFFEINE/BUTALBITAL  
ASPIRIN/CALCIUM CARB/MAGNESIUM  
ASPIRIN/CALCIUM CARBONATE  
ASPIRIN/CHLOR-MAL  
ASPIRIN/DIPHENHYDRAMINE CITRAT  
ASPIRIN/DIPHENHYDRAMINE HCL  
ASPIRIN/MAG CARB/AL AMINOACET  
ASPIRIN/MAG HYDROX/AL HYDROX  
ASPIRIN/MEPROBAMATE  
ASPIRIN/SALICYLAMIDE/CAFFEINE  
ASPIRIN/SOD BICARB/CITRIC ACID  
BROMFENAC SODIUM  
BROMPHENIRAMINE/ACETAMINOPHEN  
BUTALB/ACETAMINOPHEN/CAFFEINE  
BUTALBITAL/ACETAMINOPHEN  
BUTALBITAL/ASPIRIN/CAFFEINE  
CELECOXIB  
CELECOXIB/CAPSAICIN/MENTHOL  
CELECOXIB/LIDOCAINE/MENTHOL  
CHLORPHEN/PSEUDOEPH/IBUPROFEN  
CHOL SAL/MAGNESIUM SALICYLATE  
CHOLINE SALICYLATE  
DICLOFEN SOD/KINESIOLOGY TAPE  
DICLOFENAC EPOLAMINE  
DICLOFENAC POTASSIUM  
DICLOFENAC SODIUM  
DICLOFENAC/BENZALKONIUM CHLOR  
DICLOFENAC/CAPSICUM  
DIFLUNISAL  
ETHYL HEXYL SALICYLATE  
ETODOLAC  
FENOPROFEN CALCIUM  
FLURBIPROFEN  
FLURBIPROFEN SODIUM  
HC/PRAMOXINE HCL/CHLOROXYLENOL  
IBUPROFEN  
IBUPROFEN LYSINE/PF  
IBUPROFEN/DIPHENHYDRAMINE CIT  
IBUPROFEN/DIPHENHYDRAMINE HCL  
IBUPROFEN/FAMOTIDINE  
IBUPROFEN/P-EPHED HCL/CP  
IBUPROFEN/PHENYLEPHRINE HCL  
IBUPROFEN/PSEUDOEPHEDRINE HCL  
INDOMETHACIN  
INDOMETHACIN SODIUM

INDOMETHACIN SODIUM TRIHYDRATE  
ISOMETHEPT/ACETAMINOP/DICHLPHN  
ISOMETHEPTEN/CAF/ACETAMINOPHEN  
ISOMETHEPTENE/APAP/CAFFEIN  
ISOMETHEPTENE/APAP/DICHLPHEN  
KETOPROFEN  
KETOROLAC TROMETHAMINE  
LANSOPRAZOLE/NAPROXEN  
MAGNESIUM SALICYLATE  
MAGNESIUM SALICYLATE/CAFFEINE  
MECLOFENAMATE SODIUM  
MEFENAMIC ACID  
MELOXICAM  
ME-SAL/GLUCOS/MSM/CAY/MEN/ALOE  
ME-SALICYLATE/ACET/ISOPROPANOL  
ME-SALICYLATE/GUAIA/PET,WH  
ME-SALICYLATE/MENTH/CAMPH/PEP  
METHYL SALICYLATE  
METHYL SALICYLATE/ISOPROPANOL  
METHYL SALICYLATE/MENTH/CAMPH  
METHYL SALICYLATE/MENTHOL  
MG SAL/ACETAMINOPHN/P-TLOX/CAF  
MG SALICYLATE/ACETAMINOPH/CAFF  
MG SALICYLATE/ACETAMINOPHEN  
MG SALICYLATE/DP-HYDRAM HCL  
MG SALICYLATE/PHENYLTOLX CIT  
NA SALICYLATE/THEOBROM/CA/HERB  
NABUMETONE  
NAPROXEN  
NAPROXEN SOD-DIPHENHYDRAM HCL  
NAPROXEN SODIUM  
NAPROXEN SODIUM/MENTHOL  
NAPROXEN SODIUM/P-EPHED HCL  
NAPROXEN/CAPSAICIN/MENTHOL  
NAPROXEN/ESOMEPRAZOLE MAG  
NEPAFENAC  
OXAPROZIN  
PHENACETIN  
PHENYL SALICYLATE  
PHENYLBUTAZONE  
PHENYLEPHRINE/ACETAMINOPH/CAFF  
PIROXICAM  
ROFECOXIB  
SAL-AMIDE/ACETAMINOPHN/CAFFEIN  
SAL-AMIDE/ACETAMINOPHN/ETHAVER  
SAL-AMIDE/ACETAMINOPHN/P-TLOX  
SAL-AMIDE/POT NIT/CAFFEIN/BJPA

SALICYLAMIDE  
SALICYLAMIDE/ACETAMINOPHEN  
SALSALATE  
SODIUM SALICYLATE  
SODIUM THIOSALICYLATE  
SULINDAC  
SUPROFEN  
TOLMETIN SODIUM  
TROLAMINE SALICYLATE  
TROLAMINE SALICYLATE/MENTHOL  
VALDECOXIB  
ZICONOTIDE ACETATE

---

**Supplemental Table 8. ICD-9-CM codes used to identify cancer- and pain-related hospitalization**

| <b>Disease</b> | <b>ICD-9-CM codes</b>                                             | <b>Description</b>                                                                                       |
|----------------|-------------------------------------------------------------------|----------------------------------------------------------------------------------------------------------|
| Cancer         | 140.XX                                                            | Malignant neoplasm of lip                                                                                |
|                | 141.XX                                                            | Malignant neoplasm of tongue                                                                             |
|                | 142.XX                                                            | Malignant neoplasm of major salivary glands                                                              |
|                | 143.XX                                                            | Malignant neoplasm of gum                                                                                |
|                | 144.XX                                                            | Malignant neoplasm of floor of mouth                                                                     |
|                | 145.XX                                                            | Malignant neoplasm of other and unspecified parts of mouth                                               |
|                | 146.XX                                                            | Malignant neoplasm of oropharynx                                                                         |
|                | 147.XX                                                            | Malignant neoplasm of nasopharynx                                                                        |
|                | 148.XX                                                            | Malignant neoplasm of hypopharynx                                                                        |
|                | 149.XX                                                            | Malignant neoplasm of other and ill-defined sites within the lip, oral cavity, and pharynx               |
|                | 150.XX                                                            | Malignant neoplasm of esophagus                                                                          |
|                | 151.XX                                                            | Malignant neoplasm of stomach                                                                            |
|                | 152.XX                                                            | Malignant neoplasm of small intestine, including duodenum                                                |
|                | 153.XX                                                            | Malignant neoplasm of colon                                                                              |
|                | 154.XX                                                            | Malignant neoplasm of rectum, rectosigmoid junction, and anus                                            |
|                | 155.XX                                                            | Malignant neoplasm of liver and intrahepatic bile ducts                                                  |
|                | 156.XX                                                            | Malignant neoplasm of gallbladder and extrahepatic bile ducts                                            |
|                | 157.XX                                                            | Malignant neoplasm of pancreas                                                                           |
|                | 158.XX                                                            | Malignant neoplasm of retroperitoneum and peritoneum                                                     |
|                | 159.XX                                                            | Malignant neoplasm of other and ill-defined sites within the digestive organs and peritoneum             |
|                | 160.XX                                                            | Malignant neoplasm of nasal cavities, middle ear, and accessory sinuses                                  |
|                | 161.XX                                                            | Malignant neoplasm of larynx                                                                             |
|                | 162.XX                                                            | Malignant neoplasm of trachea, bronchus, and lung                                                        |
|                | 163.XX                                                            | Malignant neoplasm of pleura                                                                             |
|                | 164.XX                                                            | Malignant neoplasm of thymus, heart, and mediastinum                                                     |
|                | 165.XX                                                            | Malignant neoplasm of other and ill-defined sites within the respiratory system and intrathoracic organs |
|                | 170.XX                                                            | Malignant neoplasm of bone and articular cartilage                                                       |
|                | 171.XX                                                            | Malignant neoplasm of connective and other soft tissue                                                   |
|                | 172.XX                                                            | Malignant melanoma of skin                                                                               |
|                | 173.XX                                                            | Other and unspecified malignant neoplasm of skin                                                         |
|                | 174.XX                                                            | Malignant neoplasm of female breast                                                                      |
|                | 175.XX                                                            | Malignant neoplasm of male breast                                                                        |
|                | 176.XX                                                            | Kaposi's sarcoma                                                                                         |
|                | 179.XX                                                            | Malignant neoplasm of uterus, part unspecified                                                           |
|                | 180.XX                                                            | Malignant neoplasm of cervix uteri                                                                       |
| 181.XX         | Malignant neoplasm of placenta                                    |                                                                                                          |
| 182.XX         | Malignant neoplasm of body of uterus                              |                                                                                                          |
| 183.XX         | Malignant neoplasm of ovary and other uterine adnexa              |                                                                                                          |
| 184.XX         | Malignant neoplasm of other and unspecified female genital organs |                                                                                                          |
| 185.XX         | Malignant neoplasm of prostate                                    |                                                                                                          |
| 186.XX         | Malignant neoplasm of testis                                      |                                                                                                          |
| 187.XX         | Malignant neoplasm of penis and other male genital organs         |                                                                                                          |

|       |        |                                                                                            |
|-------|--------|--------------------------------------------------------------------------------------------|
|       | 188.XX | Malignant neoplasm of bladder                                                              |
|       | 189.XX | Malignant neoplasm of kidney and other and unspecified urinary organs                      |
|       | 190.XX | Malignant neoplasm of eye                                                                  |
|       | 191.XX | Malignant neoplasm of brain                                                                |
|       | 192.XX | Malignant neoplasm of other and unspecified parts of nervous system                        |
|       | 193.XX | Malignant neoplasm of thyroid gland                                                        |
|       | 194.XX | Malignant neoplasm of other endocrine glands and related structures                        |
|       | 195.XX | Malignant neoplasm of other and ill-defined sites                                          |
|       | 196.XX | Secondary and unspecified malignant neoplasm of lymph nodes                                |
|       | 197.XX | Secondary malignant neoplasm of respiratory and digestive systems                          |
|       | 198.XX | Secondary malignant neoplasm of other specified sites                                      |
|       | 199.XX | Malignant neoplasm without specification of site                                           |
|       | 200.XX | Lymphosarcoma and reticulosarcoma and other specified malignant tumors of lymphatic tissue |
|       | 201.XX | Hodgkin's disease                                                                          |
|       | 202.XX | Other malignant neoplasms of lymphoid and histiocytic tissue                               |
|       | 203.XX | Multiple myeloma and immunoproliferative neoplasms                                         |
|       | 204.XX | Lymphoid leukemia                                                                          |
|       | 205.XX | Myeloid leukemia                                                                           |
|       | 206.XX | Monocytic leukemia                                                                         |
|       | 207.XX | Other specified leukemia                                                                   |
|       | 208.XX | Leukemia of unspecified cell type                                                          |
| <hr/> |        |                                                                                            |
| Pain  | 307.80 | Psychogenic pain, site unspecified                                                         |
|       | 338.2X | Chronic pain                                                                               |
|       | 338.3X | Neoplasm related pain (acute) (chronic)                                                    |
|       | 338.4X | Chronic pain syndrome                                                                      |
|       | 388.70 | Otalgia, unspecified                                                                       |
|       | 524.62 | Arthralgia of temporomandibular joint                                                      |
|       | 525.9  | Unspecified disorder of the teeth and supporting structures                                |
|       | 569.42 | Anal or rectal pain                                                                        |
|       | 607.9  | Unspecified disorder of penis                                                              |
|       | 608.9  | Unspecified disorder of male genital organs                                                |
|       | 611.71 | Mastodynia                                                                                 |
|       | 625.9  | Unspecified symptom associated with female genital organs                                  |
|       | 719.4X | Pain in joint                                                                              |
|       | 723.1  | Cervicalgia                                                                                |
|       | 724.2  | Lumbago                                                                                    |
|       | 724.5  | Backache, unspecified                                                                      |
|       | 724.6  | Other and unspecified disorders of back: disorders of sacrum                               |
|       | 724.79 | Other and unspecified disorders of back: disorders of coccyx, other                        |
|       | 729.1  | Myalgia and myositis, unspecified                                                          |
|       | 729.5  | Pain in limb                                                                               |
|       | 733.9  | Other and unspecified disorders of bone and cartilage                                      |
|       | 780.96 | Generalized pain                                                                           |
|       | 784.0  | Headache                                                                                   |
|       | 784.1  | Throat pain                                                                                |
|       | 784.92 | Jaw pain                                                                                   |



|        |                |
|--------|----------------|
| 786.5  | Chest pain     |
| 789.0X | Abdominal pain |

---

X = 0 to 9 inclusive

ICD-9-CM = International Classification of Diseases, Ninth Revision, Clinical Modification

**Supplemental Table 9. Dialysis patient characteristics by modality on January 1, 2011 in 2010 prevalent cohort**

| Characteristics                            | All<br>(n = 153,758) | Hemodialysis<br>(n = 144,960) | Peritoneal dialysis<br>(n = 8,798) | P-value |
|--------------------------------------------|----------------------|-------------------------------|------------------------------------|---------|
| Male sex                                   | 52.2                 | 52.4                          | 48.8                               | <0.001  |
| Race                                       |                      |                               |                                    | <0.001  |
| White                                      | 52.2                 | 51.5                          | 63.8                               |         |
| Black                                      | 42.0                 | 42.8                          | 29.3                               |         |
| Other                                      | 5.8                  | 5.7                           | 6.8                                |         |
| Age group                                  |                      |                               |                                    | <0.001  |
| 20-44                                      | 16.4                 | 15.7                          | 27.1                               |         |
| 45-64                                      | 43.5                 | 43.5                          | 42.1                               |         |
| 65+                                        | 40.2                 | 40.7                          | 30.8                               |         |
| ESRD vintage                               |                      |                               |                                    | <0.001  |
| 1-2 years                                  | 16.6                 | 16.3                          | 21.4                               |         |
| 3-4 years                                  | 29.6                 | 29.4                          | 32.9                               |         |
| 5+ years                                   | 53.8                 | 54.3                          | 45.8                               |         |
| Dual status†                               | 70.9                 | 71.7                          | 58.2                               | <0.001  |
| Residential area                           |                      |                               |                                    | <0.001  |
| Large metropolitan                         | 51.3                 | 51.9                          | 41.9                               |         |
| Medium/small metropolitan                  | 29.7                 | 29.4                          | 34.4                               |         |
| Non-metropolitan                           | 19.0                 | 18.7                          | 23.7                               |         |
| Nursing home residence‡                    | 11.5                 | 12.0                          | 2.3                                | <0.001  |
| Cancer§                                    | 5.4                  | 5.4                           | 5.7                                | 0.18    |
| Prior pain-related hospitalization in 2010 | 6.7                  | 6.7                           | 6.1                                | 0.01    |
| Number of prior hospitalizations in 2010   |                      |                               |                                    | <0.001  |
| 0                                          | 41.9                 | 41.5                          | 48.6                               |         |
| 1-2                                        | 34.5                 | 34.6                          | 34.0                               |         |
| 3-4                                        | 13.4                 | 13.5                          | 11.1                               |         |
| 5 or more                                  | 10.2                 | 10.4                          | 6.3                                |         |
| Smoker                                     | 6.8                  | 6.8                           | 7.5                                | 0.01    |
| Congestive heart failure                   | 25.2                 | 25.8                          | 16.2                               | <0.001  |
| Peripheral vascular disease                | 9.8                  | 9.9                           | 7.2                                | <0.001  |
| Cerebrovascular disease                    | 7.4                  | 7.5                           | 4.5                                | <0.001  |
| Chronic obstructive pulmonary disease      | 5.2                  | 5.3                           | 3.8                                | <0.001  |
| Atherosclerotic heart disease              | 15.5                 | 15.7                          | 12.5                               | <0.001  |
| Diabetes                                   | 54.4                 | 55.4                          | 38.8                               | <0.001  |
| AIDS                                       | 1.0                  | 1.0                           | 0.9                                | 0.56    |

Note: Values expressed as percent.

Chi square test for comparisons.

† Dual status in Medicare and Medicaid

‡ Based on one or more claims in physician/carrier files

§ Based on one or more inpatient stays with a cancer diagnosis and Form 2728

**Supplemental Table 10. Adjusted hazard ratios of death, discontinued dialysis, and hospitalization in 2011-2012, associated with 2010 prescription for  $\geq 90$  days of an opioid in 2010 prevalent hemodialysis cohort (n = 141,120)**

| Characteristics                   | Outcome = death |              |         | Outcome = discontinued dialysis |              |         | Outcome = hospitalization |              |         |
|-----------------------------------|-----------------|--------------|---------|---------------------------------|--------------|---------|---------------------------|--------------|---------|
|                                   | HR              | (95% CI)     | P value | HR                              | (95% CI)     | P value | HR                        | (95% CI)     | P value |
| Opioid prescription*              |                 |              |         |                                 |              |         |                           |              |         |
| None                              | 1.00            |              |         | 1.00                            |              |         | 1.00                      |              |         |
| Short term                        | 1.04            | (1.02, 1.07) | <0.001  | 1.11                            | (1.03, 1.20) | 0.009   | 1.12                      | (1.11, 1.14) | <0.001  |
| Chronic,<br><20 MME/day           | 1.16            | (1.10, 1.21) | <0.001  | 1.30                            | (1.12, 1.50) | <0.001  | 1.25                      | (1.22, 1.29) | <0.001  |
| Chronic,<br>20-50 MME/day         | 1.25            | (1.21, 1.30) | <0.001  | 1.32                            | (1.18, 1.48) | <0.001  | 1.30                      | (1.27, 1.32) | <0.001  |
| Chronic,<br>50+ MME/day           | 1.38            | (1.33, 1.44) | <0.001  | 1.45                            | (1.28, 1.64) | <0.001  | 1.39                      | (1.35, 1.42) | <0.001  |
| Analgesic prescription            |                 |              |         |                                 |              |         |                           |              |         |
| No                                | 1.00            |              |         | 1.00                            |              |         | 1.00                      |              |         |
| Yes                               | 0.95            | (0.93, 0.98) | <0.001  | 0.92                            | (0.84, 1.01) | 0.09    | 1.03                      | (1.01, 1.05) | <0.001  |
| Gender                            |                 |              |         |                                 |              |         |                           |              |         |
| Female                            | 1.00            |              |         | 1.00                            |              |         | 1.00                      |              |         |
| Male                              | 1.11            | (1.08, 1.13) | <0.001  | 0.88                            | (0.83, 0.95) | <0.001  | 0.94                      | (0.93, 0.95) | <0.001  |
| Race                              |                 |              |         |                                 |              |         |                           |              |         |
| White                             | 1.00            |              |         | 1.00                            |              |         | 1.00                      |              |         |
| Black                             | 0.81            | (0.80, 0.83) | <0.001  | 0.62                            | (0.57, 0.66) | <0.001  | 0.96                      | (0.95, 0.97) | <0.001  |
| Other                             | 0.95            | (0.90, 0.99) | 0.01    | 0.68                            | (0.57, 0.80) | <0.001  | 0.94                      | (0.91, 0.96) | <0.001  |
| Age group                         |                 |              |         |                                 |              |         |                           |              |         |
| 20-44                             | 1.00            |              |         | 1.00                            |              |         | 1.00                      |              |         |
| 45-64                             | 1.76            | (1.68, 1.83) | <0.001  | 2.24                            | (1.85, 2.72) | <0.001  | 1.05                      | (1.03, 1.07) | <0.001  |
| 65+                               | 3.01            | (2.88, 3.14) | <0.001  | 6.79                            | (5.62, 8.22) | <0.001  | 1.20                      | (1.18, 1.23) | <0.001  |
| ESRD vintage                      |                 |              |         |                                 |              |         |                           |              |         |
| 1-2 years                         | 1.00            |              |         | 1.00                            |              |         | 1.00                      |              |         |
| 3-4 years                         | 1.14            | (1.10, 1.17) | <0.001  | 0.99                            | (0.90, 1.08) | 0.80    | 1.07                      | (1.05, 1.09) | <0.001  |
| 5+ years                          | 1.29            | (1.25, 1.32) | <0.001  | 1.00                            | (0.91, 1.09) | 0.93    | 1.09                      | (1.08, 1.11) | <0.001  |
| History of kidney transplantation |                 |              |         |                                 |              |         |                           |              |         |
| No                                | 1.00            |              |         | 1.00                            |              |         | 1.00                      |              |         |
| Yes                               | 0.88            | (0.83, 0.92) | <0.001  | 0.67                            | (0.54, 0.83) | <0.001  | 0.99                      | (0.96, 1.01) | 0.24    |
| Dual status†                      |                 |              |         |                                 |              |         |                           |              |         |
| No                                | 1.00            |              |         | 1.00                            |              |         | 1.00                      |              |         |
| Yes                               | 0.91            | (0.89, 0.93) | <0.001  | 0.76                            | (0.71, 0.82) | <0.001  | 1.01                      | (1.00, 1.03) | 0.08    |
| Residential area                  |                 |              |         |                                 |              |         |                           |              |         |
| Large                             | 1.00            |              |         | 1.00                            |              |         | 1.00                      |              |         |
| Medium/small                      | 1.01            | (0.99, 1.04) | 0.25    | 1.60                            | (1.48, 1.72) | <0.001  | 0.96                      | (0.95, 0.98) | <0.001  |
| Non-metro                         | 1.10            | (1.07, 1.13) | <0.001  | 1.74                            | (1.60, 1.89) | <0.001  | 0.92                      | (0.90, 0.93) | <0.001  |
| Nursing home residence‡           |                 |              |         |                                 |              |         |                           |              |         |
| No                                | 1.00            |              |         | 1.00                            |              |         | 1.00                      |              |         |
| Yes                               | 1.57            | (1.53, 1.61) | <0.001  | 2.25                            | (2.08, 2.43) | <0.001  | 1.08                      | (1.06, 1.10) | <0.001  |
| Cancer§                           |                 |              |         |                                 |              |         |                           |              |         |
| No                                | 1.00            |              |         | 1.00                            |              |         | 1.00                      |              |         |
| Yes                               | 1.26            | (1.21, 1.30) | <0.001  | 1.40                            | (1.26, 1.56) | <0.001  | 1.04                      | (1.02, 1.07) | 0.002   |

|                                            |      |              |        |      |              |        |      |              |        |  |
|--------------------------------------------|------|--------------|--------|------|--------------|--------|------|--------------|--------|--|
| Prior pain-related hospitalization in 2010 |      |              |        |      |              |        |      |              |        |  |
| No                                         | 1.00 |              |        | 1.00 |              |        | 1.00 |              |        |  |
| Yes                                        | 0.95 | (0.91, 0.99) | 0.007  | 0.98 | (0.86, 1.11) | 0.73   | 1.16 | (1.13, 1.18) | <0.001 |  |
| Number of prior hospitalizations in 2010   |      |              |        |      |              |        |      |              |        |  |
| 0                                          | 1.00 |              |        | 1.00 |              |        | 1.00 |              |        |  |
| 1-2                                        | 1.56 | (1.52, 1.60) | <0.001 | 1.41 | (1.30, 1.53) | <0.001 | 1.56 | (1.54, 1.59) | <0.001 |  |
| 3-4                                        | 2.17 | (2.10, 2.24) | <0.001 | 1.85 | (1.67, 2.04) | <0.001 | 2.35 | (2.31, 2.40) | <0.001 |  |
| 5 or more                                  | 3.03 | (2.93, 3.14) | <0.001 | 2.50 | (2.23, 2.79) | <0.001 | 3.65 | (3.57, 3.73) | <0.001 |  |
| Smoker                                     |      |              |        |      |              |        |      |              |        |  |
| No                                         | 1.00 |              |        | 1.00 |              |        | 1.00 |              |        |  |
| Yes                                        | 1.14 | (1.10, 1.19) | <0.001 | 1.25 | (1.10, 1.43) | <0.001 | 1.08 | (1.05, 1.10) | <0.001 |  |
| Congestive heart failure                   |      |              |        |      |              |        |      |              |        |  |
| No                                         | 1.00 |              |        | 1.00 |              |        | 1.00 |              |        |  |
| Yes                                        | 1.20 | (1.17, 1.23) | <0.001 | 1.08 | (1.00, 1.16) | 0.05   | 1.06 | (1.04, 1.07) | <0.001 |  |
| Peripheral vascular disease                |      |              |        |      |              |        |      |              |        |  |
| No                                         | 1.00 |              |        | 1.00 |              |        | 1.00 |              |        |  |
| Yes                                        | 1.07 | (1.04, 1.11) | <0.001 | 1.15 | (1.05, 1.26) | 0.004  | 1.02 | (1.00, 1.05) | 0.02   |  |
| Cerebrovascular disease                    |      |              |        |      |              |        |      |              |        |  |
| No                                         | 1.00 |              |        | 1.00 |              |        | 1.00 |              |        |  |
| Yes                                        | 1.02 | (0.99, 1.06) | 0.21   | 1.29 | (1.17, 1.43) | <0.001 | 1.03 | (1.00, 1.05) | 0.02   |  |
| Chronic obstructive pulmonary disease      |      |              |        |      |              |        |      |              |        |  |
| No                                         | 1.00 |              |        | 1.00 |              |        | 1.00 |              |        |  |
| Yes                                        | 1.12 | (1.08, 1.16) | <0.001 | 1.10 | (0.98, 1.24) | 0.09   | 1.12 | (1.09, 1.15) | <0.001 |  |
| Atherosclerotic heart disease              |      |              |        |      |              |        |      |              |        |  |
| No                                         | 1.00 |              |        | 1.00 |              |        | 1.00 |              |        |  |
| Yes                                        | 1.13 | (1.11, 1.16) | <0.001 | 1.07 | (0.98, 1.16) | 0.12   | 1.07 | (1.06, 1.09) | <0.001 |  |
| Diabetes                                   |      |              |        |      |              |        |      |              |        |  |
| No                                         | 1.00 |              |        | 1.00 |              |        | 1.00 |              |        |  |
| Yes                                        | 1.16 | (1.13, 1.18) | <0.001 | 0.87 | (0.81, 0.93) | <0.001 | 1.12 | (1.11, 1.14) | <0.001 |  |
| AIDS                                       |      |              |        |      |              |        |      |              |        |  |
| No                                         | 1.00 |              |        | 1.00 |              |        | 1.00 |              |        |  |
| Yes                                        | 1.20 | (1.07, 1.35) | 0.002  | 1.23 | (0.75, 2.03) | 0.41   | 1.12 | (1.06, 1.19) | <0.001 |  |

Abbreviations: HR, hazard ratio; CI, confidence interval.

\* Short term: 1- to 89-day filled prescription supply within study year; chronic: 90-day or more filled prescription supply within study year

† Dual status in Medicare and Medicaid

‡ Based on one or more claims in physician/carrier files

§ Based on one or more inpatient stay with a cancer diagnosis and Form 2728

**Supplemental Table 11. Adjusted hazard ratios of death, discontinued dialysis, and hospitalization in 2011-2012, associated with 2010 prescription for ≥ 90 days of an opioid in 2010 prevalent peritoneal dialysis cohort (n = 8,637)**

| Characteristics                   | Outcome = death |              |         | Outcome = discontinued dialysis |              |         | Outcome = hospitalization |              |         |
|-----------------------------------|-----------------|--------------|---------|---------------------------------|--------------|---------|---------------------------|--------------|---------|
|                                   | HR              | (95% CI)     | P value | HR                              | (95% CI)     | P value | HR                        | (95% CI)     | P value |
| Opioid prescription*              |                 |              |         |                                 |              |         |                           |              |         |
| None                              | 1.00            |              |         | 1.00                            |              |         | 1.00                      |              |         |
| Short term                        | 1.08            | (0.98, 1.19) | 0.13    | 1.55                            | (1.11, 2.16) | 0.01    | 1.19                      | (1.13, 1.26) | <0.001  |
| Chronic,<br><20 MME/day           | 1.15            | (0.92, 1.44) | 0.21    | 1.70                            | (0.88, 3.29) | 0.11    | 1.30                      | (1.14, 1.48) | <0.001  |
| Chronic,<br>20-50 MME/day         | 1.39            | (1.19, 1.63) | <0.001  | 2.20                            | (1.34, 3.61) | 0.002   | 1.26                      | (1.14, 1.39) | <0.001  |
| Chronic,<br>50+ MME/day           | 1.41            | (1.19, 1.68) | <0.001  | 1.79                            | (1.02, 3.13) | 0.04    | 1.25                      | (1.13, 1.40) | <0.001  |
| Analgesic prescription            |                 |              |         |                                 |              |         |                           |              |         |
| No                                | 1.00            |              |         | 1.00                            |              |         | 1.00                      |              |         |
| Yes                               | 1.00            | (0.88, 1.14) | 0.96    | 1.30                            | (0.89, 1.91) | 0.18    | 1.10                      | (1.02, 1.18) | 0.01    |
| Gender                            |                 |              |         |                                 |              |         |                           |              |         |
| Female                            | 1.00            |              |         | 1.00                            |              |         | 1.00                      |              |         |
| Male                              | 1.10            | (1.01, 1.20) | 0.03    | 0.79                            | (0.60, 1.03) | 0.08    | 1.00                      | (0.95, 1.05) | 0.94    |
| Race                              |                 |              |         |                                 |              |         |                           |              |         |
| White                             | 1.00            |              |         | 1.00                            |              |         | 1.00                      |              |         |
| Black                             | 0.85            | (0.76, 0.94) | 0.002   | 0.54                            | (0.36, 0.81) | 0.003   | 1.05                      | (0.99, 1.11) | 0.09    |
| Other                             | 0.77            | (0.63, 0.93) | 0.006   | 0.37                            | (0.15, 0.91) | 0.03    | 0.83                      | (0.75, 0.91) | <0.001  |
| Age group                         |                 |              |         |                                 |              |         |                           |              |         |
| 20-44                             | 1.00            |              |         | 1.00                            |              |         | 1.00                      |              |         |
| 45-64                             | 1.98            | (1.71, 2.29) | <0.001  | 2.39                            | (1.32, 4.33) | 0.004   | 1.02                      | (0.96, 1.09) | 0.48    |
| 65+                               | 3.61            | (3.08, 4.23) | <0.001  | 7.31                            | (3.99, 13.4) | <0.001  | 1.16                      | (1.08, 1.26) | <0.001  |
| ESRD vintage                      |                 |              |         |                                 |              |         |                           |              |         |
| 1-2 years                         | 1.00            |              |         | 1.00                            |              |         | 1.00                      |              |         |
| 3-4 years                         | 1.25            | (1.11, 1.40) | <0.001  | 1.41                            | (0.99, 2.01) | 0.06    | 1.10                      | (1.03, 1.17) | 0.005   |
| 5+ years                          | 1.55            | (1.38, 1.75) | <0.001  | 1.34                            | (0.92, 1.95) | 0.12    | 1.10                      | (1.03, 1.18) | 0.004   |
| History of Kidney transplantation |                 |              |         |                                 |              |         |                           |              |         |
| No                                | 1.00            |              |         | 1.00                            |              |         | 1.00                      |              |         |
| Yes                               | 0.91            | (0.76, 1.09) | 0.30    | 0.54                            | (0.25, 1.20) | 0.13    | 1.05                      | (0.96, 1.14) | 0.31    |
| Dual statut†                      |                 |              |         |                                 |              |         |                           |              |         |
| No                                | 1.00            |              |         | 1.00                            |              |         | 1.00                      |              |         |
| Yes                               | 0.94            | (0.86, 1.04) | 0.22    | 0.67                            | (0.49, 0.91) | 0.01    | 1.04                      | (0.99, 1.10) | 0.12    |
| Residential area                  |                 |              |         |                                 |              |         |                           |              |         |
| Large                             | 1.00            |              |         | 1.00                            |              |         | 1.00                      |              |         |
| Medium/small                      | 1.01            | (0.92, 1.12) | 0.84    | 1.35                            | (0.98, 1.87) | 0.07    | 0.99                      | (0.94, 1.05) | 0.82    |
| Non-metro                         | 1.16            | (1.04, 1.29) | 0.007   | 1.48                            | (1.05, 2.09) | 0.03    | 0.98                      | (0.92, 1.04) | 0.54    |
| Nursing home residence‡           |                 |              |         |                                 |              |         |                           |              |         |
| No                                | 1.00            |              |         | 1.00                            |              |         | 1.00                      |              |         |
| Yes                               | 1.93            | (1.59, 2.35) | <0.001  | 2.39                            | (1.38, 4.14) | 0.002   | 1.33                      | (1.14, 1.55) | <0.001  |
| Cancer§                           |                 |              |         |                                 |              |         |                           |              |         |
| No                                | 1.00            |              |         | 1.00                            |              |         | 1.00                      |              |         |
| Yes                               | 1.25            | (1.07, 1.45) | 0.005   | 1.39                            | (0.92, 2.11) | 0.12    | 1.00                      | (0.90, 1.11) | 0.98    |

|                                            |      |              |        |      |              |        |      |              |        |
|--------------------------------------------|------|--------------|--------|------|--------------|--------|------|--------------|--------|
| Prior pain-related hospitalization in 2010 |      |              |        |      |              |        |      |              |        |
| No                                         | 1.00 |              |        | 1.00 |              |        | 1.00 |              |        |
| Yes                                        | 0.98 | (0.82, 1.16) | 0.77   | 0.91 | (0.51, 1.61) | 0.73   | 1.17 | (1.06, 1.29) | 0.003  |
| Number of prior hospitalizations in 2010   |      |              |        |      |              |        |      |              |        |
| 0                                          | 1.00 |              |        | 1.00 |              |        | 1.00 |              |        |
| 1-2                                        | 1.50 | (1.35, 1.66) | <0.001 | 1.45 | (1.05, 2.01) | 0.02   | 1.54 | (1.45, 1.63) | <0.001 |
| 3-4                                        | 2.13 | (1.87, 2.44) | <0.001 | 1.69 | (1.07, 2.66) | 0.03   | 2.19 | (2.02, 2.38) | <0.001 |
| 5 or more                                  | 3.45 | (2.95, 4.03) | <0.001 | 5.25 | (3.28, 8.41) | <0.001 | 3.21 | (2.89, 3.56) | <0.001 |
| Smoker                                     |      |              |        |      |              |        |      |              |        |
| No                                         | 1.00 |              |        | 1.00 |              |        | 1.00 |              |        |
| Yes                                        | 1.02 | (0.87, 1.20) | 0.78   | 1.33 | (0.82, 2.16) | 0.24   | 0.98 | (0.90, 1.08) | 0.72   |
| Congestive heart failure                   |      |              |        |      |              |        |      |              |        |
| No                                         | 1.00 |              |        | 1.00 |              |        | 1.00 |              |        |
| Yes                                        | 1.16 | (1.04, 1.29) | 0.008  | 1.09 | (0.76, 1.54) | 0.65   | 1.06 | (0.99, 1.13) | 0.09   |
| Peripheral vascular disease                |      |              |        |      |              |        |      |              |        |
| No                                         | 1.00 |              |        | 1.00 |              |        | 1.00 |              |        |
| Yes                                        | 1.26 | (1.10, 1.44) | 0.001  | 0.98 | (0.61, 1.56) | 0.92   | 1.04 | (0.95, 1.15) | 0.39   |
| Cerebrovascular disease                    |      |              |        |      |              |        |      |              |        |
| No                                         | 1.00 |              |        | 1.00 |              |        | 1.00 |              |        |
| Yes                                        | 1.23 | (1.04, 1.45) | 0.02   | 1.21 | (0.71, 2.08) | 0.48   | 1.10 | (0.98, 1.24) | 0.09   |
| Chronic obstructive pulmonary disease      |      |              |        |      |              |        |      |              |        |
| No                                         | 1.00 |              |        | 1.00 |              |        | 1.00 |              |        |
| Yes                                        | 1.24 | (1.04, 1.49) | 0.02   | 1.16 | (0.68, 1.98) | 0.59   | 1.21 | (1.07, 1.37) | 0.003  |
| Atherosclerotic heart disease              |      |              |        |      |              |        |      |              |        |
| No                                         | 1.00 |              |        | 1.00 |              |        | 1.00 |              |        |
| Yes                                        | 1.25 | (1.11, 1.40) | <0.001 | 1.01 | (0.69, 1.48) | 0.96   | 1.04 | (0.96, 1.13) | 0.30   |
| Diabetes                                   |      |              |        |      |              |        |      |              |        |
| No                                         | 1.00 |              |        | 1.00 |              |        | 1.00 |              |        |
| Yes                                        | 1.59 | (1.45, 1.73) | <0.001 | 1.01 | (0.76, 1.34) | 0.97   | 1.26 | (1.20, 1.33) | <0.001 |
| AIDS                                       |      |              |        |      |              |        |      |              |        |
| No                                         | 1.00 |              |        | 1.00 |              |        | 1.00 |              |        |
| Yes                                        | 0.93 | (0.53, 1.66) | 0.82   | 1.36 | (0.19, 9.95) | 0.76   | 1.07 | (0.84, 1.36) | 0.61   |

Abbreviations: HR, hazard ratio; CI, confidence interval.

\* Short term: 1- to 89-day filled prescription supply within study year; chronic: 90-day or more filled prescription supply within study year

† Dual status in Medicare and Medicaid

‡ Based on one or more claims in physician/carrier files

§ Based on one or more inpatient stay with a cancer diagnosis and Form 2728
